# Supplementary material
Source: ML conference proceedings conference paper supplement (https://proceedings.mlr.press/v37/kusnera15.html)
Supplement: Supplementary file 1 [file kusnera15-supp.pdf]

---

# Supplementary Material for Differentially Private Bayesian Optimization

---

**Matt J. Kusner**  
**Jacob R. Gardner**  
**Roman Garnett**  
**Kilian Q. Weinberger**

MKUSNER@WUSTL.EDU  
 GARDNER.JAKE@WUSTL.EDU  
 GARNETT@WUSTL.EDU  
 KILIAN@WUSTL.EDU

Washington University in St. Louis, 1 Brookings Dr., St. Louis, MO 63130

Here we give the omitted proofs of intermediate results left out of the main paper.

## With observation noise

*Proof of Corollary 1.* Let  $\mathcal{V}, \mathcal{V}'$  be neighboring datasets. Let  $E$  denote the event that the global sensitivity bound of Theorem 1 holds. Thus,  $\Pr[E] \geq 1 - \delta$ . If  $E$  holds, drawing  $\tilde{\lambda}$  with probability proportional to  $\exp(\epsilon\mu_T(\lambda)/(4\sqrt{\beta_{T+1}} + 2c))$  is  $\epsilon$ -differentially private by the privacy guarantee of the exponential mechanism (McSherry & Talwar, 2007). Specifically, the inequality holds:  $\Pr[\mathcal{A}(\mathcal{V}) = \tilde{\lambda}^{(T)} | E] \leq e^\epsilon \Pr[\mathcal{A}(\mathcal{V}') = \tilde{\lambda} | E]$ . We demonstrate this implies  $(\epsilon, \delta)$ -differential privacy,

$$\begin{aligned} \Pr[\mathcal{A}(\mathcal{V}) = \tilde{\lambda}] & \\ & \leq \Pr[\mathcal{A}(\mathcal{V}) = \tilde{\lambda} | E] \Pr[E] + (1 - \Pr[E]) \\ & \leq e^\epsilon \Pr[\mathcal{A}(\mathcal{V}') = \tilde{\lambda} | E] \Pr[E] + \delta \\ & \leq e^\epsilon \Pr[\mathcal{A}(\mathcal{V}') = \tilde{\lambda}, E] + \delta \\ & \leq e^\epsilon \Pr[\mathcal{A}(\mathcal{V}') = \tilde{\lambda}] + \delta. \end{aligned}$$

■

*Proof of Corollary 2.* Let  $\mathcal{V}, \mathcal{V}'$  be neighboring datasets. Again let  $E$  denote the event that the global sensitivity of Theorem 3 holds (and thus  $\Pr[E] \geq 1 - \delta$ ). If  $E$  holds, adding Laplacian noise as described in Algorithm 1 to  $\max_{t \leq T} v_t$  makes  $\tilde{v}$   $\epsilon$ -differentially private, by the guarantee of the Laplace mechanism. Specifically, the inequality holds:  $\Pr[\mathcal{A}(\mathcal{V}) = \tilde{v} | E] \leq e^\epsilon \Pr[\mathcal{A}(\mathcal{V}') = \tilde{v} | E]$ . Using the same technique as the proof of Corollary 1 it is straightforward to show that  $\tilde{v}$  is  $(\epsilon, \delta)$ -differentially private. ■

## Without observation noise

*Proof of Theorem 5.* Note that at time  $T$  the regret is  $f(\lambda^*) - f(\lambda_T) \leq \Omega \triangleq Ae^{-\frac{T\tau}{(\log T)^{d/4}}}$  (de Freitas

et al., 2012) with probability at least  $1 - \frac{\delta}{2}$ . Observe the similarity of the above expression to eq. (6) (with  $\max_{t \leq T} f(\lambda_t)$  replaced with  $f(\lambda_T)$ ). In fact, the remainder of this proof follows in nearly the same way as the proof of Theorem 3. The only differences are (a) we use  $f(\lambda_T)$  instead of the max term, (b) we use the regret bound of de Freitas et al. (2012) and, (c) we need not bound the maximum  $v$  as there is no noise. ■

*Proof of Corollary 3.* Given the sensitivity bound of Theorem 5, the proof follows in the same way as the proof of Corollary 2, where  $E$  is the event that Theorem 5 holds. ■

*Proof of Theorem 6.* For a random variable  $Z \sim \text{Lap}(b)$ , recall that  $\Pr[|Z| \leq ab] = 1 - e^{-a}$ . Therefore, as defined in Algorithm 2,  $|\tilde{f} - f(\lambda_T)| \leq ab$  for  $b = \left(\frac{\Omega}{\epsilon} + \frac{\epsilon}{\epsilon}\right)$  with probability  $1 - e^{-a}$ . Note that, similar to eq. (7), we have for the noise-free setting,

$$ab \geq f(\lambda_T) - \tilde{f} \geq (f(\lambda^*) - \Omega) - \tilde{f}$$

where the second inequality follows from the regret bound of de Freitas et al. (2012) and holds w.p. at least  $1 - \delta$ . This implies that  $f(\lambda^*) - \tilde{f} \leq \Omega + ab$ . We can use a similar analysis to eq. (8) to show that  $f(\lambda^*) - \tilde{f} \geq -\Omega - ab$ . Therefore  $|\tilde{f} - f(\lambda^*)| \leq \Omega + ab$  w.p. greater than  $1 - (\delta + e^{-a})$ . ■

## Without the GP assumption

*Proof of Corollary 4.* Given the total global sensitivity bound implied by Theorem 7, the proof is nearly identical to the proof of Corollary 2, where  $E$  is the event that the total global sensitivity holds. ■

## References

de Freitas, Nando, Smola, Alex, and Zoghi, Masrour. Exponential regret bounds for gaussian process ban-

ditions with deterministic observations. In *ICML*, 2012.

Dwork, Cynthia, McSherry, Frank, Nissim, Kobbi, and Smith, Adam. Calibrating noise to sensitivity in private data analysis. In *Theory of Cryptography*, pp. 265–284. Springer, 2006.

McSherry, Frank and Talwar, Kunal. Mechanism design via differential privacy. In *FOCS*, pp. 94–103. IEEE, 2007.

Srinivas, Niranjana, Krause, Andreas, Kakade, Sham M, and Seeger, Matthias. Gaussian process optimization in the bandit setting: No regret and experimental design. In *ICML*, 2010.
